# Supplementary material for: The GD3 ganglioside promotes cell growth, plasticity and chemotherapy resistance of human glioblastoma cancer stem cells
Source: Research Square preprint supplement (doi:10.21203/rs.3.rs-5246487/v1), 2025-03-31
Supplement: Supplementary file 1 [file 0b9fda8d39a01971ab5293eb.docx]

| **Gene ID** | **Gene Symbol** | **shCTRL Average Read Count** | **shS2 average Read Count** | **log2 (shS2 / shCTRL)** | **Qvalue (shS2 / shCTRL)** |
| --- | --- | --- | --- | --- | --- |
| 100133941 | CD24 | 544.24 | 2148.71 | 1.98 | 6.50E-14 |
| 1002 | CDH4 | 1.48 | 23.61 | 3.99 | 0.01993893 |
| 1004 | CDH6 | 18.85 | 66.63 | 1.82 | 0.01743160 |
| 1005 | CDH7 | 0.99 | 43.68 | 5.45 | 3.88E-04 |
| 100996492 | CTXND1 | 53.31 | 720.86 | 3.75 | 1.71E-23 |
| 101059918 | GOLGA8R | 272.1 | 1164.79 | 2.09 | 6.65E-18 |
| 10125 | RASGRP1 | 64.43 | 245.99 | 1.93 | 9.56E-06 |
| 10203 | CALCRL | 23.5 | 93.51 | 1.99 | 0.02553934 |
| 10231 | RCAN2 | 414.46 | 1268.85 | 1.61 | 2.43E-07 |
| 10335 | IRAG1 | 290.09 | 938.4 | 1.69 | 1.67E-09 |
| 10417 | SPON2 | 7.04 | 43.28 | 2.61 | 0.029448444 |
| 106821730 | BUB1B-PAK6 | 0.18 | 79.94 | 8.77 | 1.50E-06 |
| 10769 | PLK2 | 14.86 | 95.12 | 2.67 | 3.23E-05 |
| 10777 | ARPP21 | 0.5 | 26.7 | 5.74 | 0.01206722 |
| 10840 | ALDH1L1 | 27.6 | 89.89 | 1.70 | 0.03363955 |
| 11001 | SLC27A2 | 1.51 | 44.94 | 4.89 | 9.85E-04 |
| 1124 | CHN2 | 39.41 | 120.53 | 1.61 | 0.01482358 |
| 114795 | TMEM132B | 23.98 | 98.28 | 2.03 | 0.006734402 |
| 115207 | KCTD12 | 14.9 | 297.22 | 4.31 | 6.92E-21 |
| 115361 | GBP4 | 0.5 | 46.72 | 6.55 | 0.00100358 |
| 121601 | ANO4 | 13.85 | 123.88 | 3.16 | 2.02E-07 |
| 1268 | CNR1 | 1491.15 | 11261.65 | 2.91 | 5.28E-04 |
| 1296 | COL8A2 | 171.94 | 585.03 | 1.76 | 2.90E-04 |
| 134829 | CLVS2 | 0.18 | 19.39 | 6.74 | 0.00466913 |
| 135152 | B3GAT2 | 6 | 42.12 | 2.81 | 0.00967447 |
| 137970 | UNC5D | 101.22 | 633.01 | 2.64 | 8.97E-23 |
| 139065 | SLITRK4 | 0.5 | 28 | 5.81 | 0.009298314 |
| 140597 | TCEAL2 | 5.03 | 46.4 | 3.20 | 0.007794753 |
| 144100 | PLEKHA7 | 54 | 309.4 | 2.51 | 3.90E-09 |
| 145741 | C2CD4A | 14.46 | 165.04 | 3.51 | 8.36E-06 |
| 147686 | ZNF418 | 32 | 163.69 | 2.35 | 8.99E-05 |
| 148198 | ZNF98 | 5.94 | 42.42 | 2.83 | 0.008018837 |
| 1490 | CCN2 | 5.5 | 123.6 | 4.48 | 3.94E-08 |
| 150 | ADRA2A | 1.5 | 26.29 | 4.13 | 0.020386556 |
| 153478 | PLEKHG4B | 11.45 | 276.75 | 4.59 | 2.65E-18 |
| 161436 | EML5 | 60.19 | 200.68 | 1.73 | 3.22E-04 |
| 170689 | ADAMTS15 | 973.93 | 7721.67 | 2.98 | 1.32E-29 |
| 170690 | ADAMTS16 | 0.18 | 84.06 | 8.84 | 1.32E-06 |
| 170692 | ADAMTS18 | 2.96 | 194.89 | 6.0 | 1.56E-13 |
| 1734 | DIO2 | 8.96 | 58.39 | 2.70 | 0.002408089 |
| 1756 | DMD | 1.99 | 162.17 | 6.35 | 4.04E-12 |
| 1803 | DPP4 | 353.41 | 1171.89 | 1.72 | 1.08E-12 |
| 1829 | DSG2 | 15.34 | 236.93 | 3.94 | 4.73E-17 |
| 185 | AGTR1 | 6.45 | 37.25 | 2.52 | 0.029666971 |
| 1901 | S1PR1 | 26.49 | 162.31 | 2.61 | 2.69E-05 |
| 2066 | ERBB4 | 21.58 | 275.71 | 3.67 | 5.68E-12 |
| 2104 | ESRRG | 0.18 | 26.35 | 7.18 | 9.44E-04 |
| 220 | ALDH1A3 | 5.45 | 105.39 | 4.27 | 3.65E-07 |
| 220441 | RNF152 | 10.46 | 125.43 | 3.58 | 5.52E-09 |
| 221833 | SP8 | 3.49 | 32.3 | 3.21 | 0.019539323 |
| 225 | ABCD2 | 116.69 | 382.91 | 1.71 | 1.77E-07 |
| 2257 | FGF12 | 53.28 | 420 | 2.97 | 2.39E-15 |
| 22801 | ITGA11 | 333.41 | 1744.74 | 2.38 | 2.87E-09 |
| 22865 | SLITRK3 | 497.63 | 1836.12 | 1.88 | 6.04E-20 |
| 22895 | RPH3A | 828.27 | 2702.78 | 1.70 | 6.08E-07 |
| 22936 | ELL2 | 57.94 | 176.19 | 1.60 | 0.038876735 |
| 23090 | ZNF423 | 21.4 | 405.44 | 4.24 | 4.07E-25 |
| 23305 | ACSL6 | 18.46 | 65.68 | 1.83 | 0.023725328 |
| 23359 | FAM189A1 | 4.47 | 955.66 | 7.73 | 8.71E-43 |
| 23418 | CRB1 | 15.49 | 72.69 | 2.23 | 0.014400164 |
| 23461 | ABCA5 | 9.08 | 144.3 | 3.99 | 9.17E-07 |
| 23550 | PSD4 | 32.65 | 194.52 | 2.57 | 2.23E-08 |
| 253559 | CADM2 | 19.8 | 73.5 | 1.89 | 0.010483378 |
| 254887 | ZDHHC23 | 1055.77 | 3202.49 | 1.60 | 1.79E-13 |
| 255631 | COL24A1 | 1.5 | 49.1 | 5.02 | 2.11E-04 |
| 255743 | NPNT | 408.63 | 3007.64 | 2.87 | 4.61E-17 |
| 2558 | GABRA5 | 0.5 | 76.72 | 7.27 | 8.05E-05 |
| 25854 | FAM149A | 19.3 | 103.27 | 2.41 | 8.65E-05 |
| 26002 | MOXD1 | 2.49 | 73.15 | 4.87 | 6.25E-06 |
| 26011 | TENM4 | 520.72 | 1839.06 | 1.82 | 1.08E-12 |
| 26025 | PCDHGA12 | 3.97 | 33.93 | 3.09 | 0.013132043 |
| 26032 | SUSD5 | 189.18 | 1022.36 | 2.43 | 4.13E-23 |
| 2615 | LRRC32 | 11.86 | 52.81 | 2.15 | 0.025428076 |
| 2624 | GATA2 | 39.03 | 633.79 | 4.02 | 1.23E-28 |
| 2633 | GBP1 | 17.5 | 77.5 | 2.14 | 0.007563815 |
| 2634 | GBP2 | 70.3 | 387.32 | 2.46 | 3.70E-07 |
| 27300 | ZNF544 | 54.43 | 225.82 | 2.05 | 1.61E-06 |
| 27330 | RPS6KA6 | 1.47 | 36.88 | 4.64 | 0.002421379 |
| 283316 | CD163L1 | 11 | 131.44 | 3.57 | 1.86E-08 |
| 2835 | GPR12 | 4.49 | 76.23 | 4.08 | 2.35E-06 |
| 2890 | GRIA1 | 240.61 | 1602.68 | 2.73 | 6.48E-21 |
| 3075 | CFH | 1.99 | 33.34 | 4.06 | 0.006166908 |
| 3078 | CFHR1 | 0.18 | 13.32 | 6.20 | 0.023471775 |
| 30817 | ADGRE2 | 0.5 | 25.88 | 5.69 | 0.014607014 |
| 33 | ACADL | 6.94 | 154.59 | 4.47 | 1.05E-12 |
| 339896 | GADL1 | 0.5 | 156.74 | 8.30 | 1.37E-06 |
| 342184 | FMN1 | 171.64 | 777.3 | 2.17 | 1.13E-08 |
| 347252 | IGFBPL1 | 19.07 | 82.11 | 2.10 | 0.033448358 |
| 347404 | LANCL3 | 13.36 | 99.76 | 2.90 | 2.29E-05 |
| 347731 | LRRTM3 | 47.52 | 168.96 | 1.82 | 4.95E-04 |
| 347902 | AMIGO2 | 3.97 | 129.61 | 5.02 | 2.30E-11 |
| 3595 | IL12RB2 | 2.98 | 96.17 | 5.01 | 1.11E-08 |
| 3601 | IL15RA | 14.86 | 137.28 | 3.20 | 3.91E-08 |
| 361 | AQP4 | 378.48 | 2052.49 | 2.43 | 0.04824069 |
| 3756 | KCNH1 | 18.88 | 78.53 | 2.05 | 0.00740385 |
| 3759 | KCNJ2 | 18.03 | 229.31 | 3.66 | 9.57E-10 |
| 3815 | KIT | 3.47 | 109.91 | 4.98 | 1.22E-09 |
| 389136 | VGLL3 | 3.96 | 49.19 | 3.63 | 4.72E-04 |
| 389432 | SAMD5 | 0.49 | 19.46 | 5.29 | 0.03350031 |
| 389558 | FAM180A | 5.52 | 45.54 | 3.04 | 0.016177385 |
| 389610 | XKR5 | 54.87 | 175.46 | 1.67 | 5.28E-04 |
| 392255 | GDF6 | 4.44 | 40.98 | 3.20 | 0.00422991 |
| 399947 | C11orf87 | 1.49 | 258.21 | 7.44 | 3.38E-11 |
| 401097 | C3orf80 | 29.07 | 219.84 | 2.91 | 1.76E-05 |
| 401190 | RGS7BP | 2.49 | 61.33 | 4.62 | 1.61E-05 |
| 4060 | LUM | 77.48 | 704.7 | 3.18 | 8.96E-20 |
| 4233 | MET | 0.18 | 32.91 | 7.50 | 2.73E-04 |
| 4239 | MFAP4 | 118.31 | 374.29 | 1.66 | 4.84E-07 |
| 4674 | NAP1L2 | 7.47 | 90.54 | 3.59 | 1.04E-06 |
| 4747 | NEFL | 7.95 | 516.33 | 6.02 | 6.96E-37 |
| 4753 | NELL2 | 2.48 | 430.62 | 7.43 | 2.85E-22 |
| 4843 | NOS2 | 145.69 | 764.82 | 2.39 | 5.61E-10 |
| 4915 | NTRK2 | 135.4 | 493.81 | 1.86 | 0.00421140 |
| 4923 | NTSR1 | 14.35 | 278.56 | 4.27 | 1.87E-18 |
| 4939 | OAS2 | 60.8 | 342.34 | 2.49 | 5.37E-11 |
| 5046 | PCSK6 | 0.18 | 24.61 | 7.08 | 0.00244046 |
| 50945 | TBX22 | 0.18 | 11.87 | 6.04 | 0.03565086 |
| 5100 | PCDH8 | 32.21 | 131.98 | 2.03 | 0.04596019 |
| 51046 | ST8SIA3 | 14.61 | 123.42 | 3.078524642 | 7.06E-04 |
| 5126 | PCSK2 | 0.18 | 21.43 | 6.885938508 | 0.00293247 |
| 51313 | GASK1B | 1 | 67.63 | 6.079755537 | 3.81E-05 |
| 5136 | PDE1A | 0.5 | 20.45 | 5.35 | 0.02981507 |
| 51363 | CHST15 | 0.5 | 122.81 | 7.94 | 5.97E-06 |
| 5167 | ENPP1 | 4.46 | 195.87 | 5.45 | 3.06E-16 |
| 5239 | PGM5 | 203.43 | 686 | 1.75 | 2.23E-06 |
| 5274 | SERPINI1 | 131.72 | 467.34 | 1.82 | 4.77E-04 |
| 5325 | PLAGL1 | 13.92 | 291.53 | 4.38 | 1.26E-22 |
| 5468 | PPARG | 53.35 | 177.13 | 1.73 | 3.28E-04 |
| 55068 | ENOX1 | 31.37 | 146.71 | 2.22 | 1.24E-05 |
| 55106 | SLFN12 | 20.78 | 173.27 | 3.05 | 5.97E-10 |
| 55314 | TMEM144 | 0.18 | 40.93 | 7.81 | 7.41E-05 |
| 55532 | SLC30A10 | 3.43 | 39.13 | 3.51 | 0.0061324 |
| 55816 | DOK5 | 0.99 | 294.29 | 8.21 | 4.63E-11 |
| 55897 | MESP1 | 10.42 | 51.32 | 2.29 | 0.0155084 |
| 56103 | PCDHGB2 | 44.6 | 390.88 | 3.13 | 5.77E-17 |
| 56128 | PCDHB8 | 18.79 | 154.05 | 3.03 | 9.54E-09 |
| 56130 | PCDHB6 | 21.42 | 70.76 | 1.72 | 0.02447363 |
| 56131 | PCDHB4 | 13.38 | 58.8 | 2.13 | 0.01329342 |
| 56132 | PCDHB3 | 44.28 | 249.98 | 2.49 | 2.58E-08 |
| 56892 | TCIM | 1.48 | 55.37 | 5.22 | 8.04E-05 |
| 56911 | MAP3K7CL | 321.08 | 1001.66 | 1.64 | 5.89E-07 |
| 56920 | SEMA3G | 14.3 | 55.11 | 1.94 | 0.03327065 |
| 56934 | CA10 | 0.49 | 32.19 | 6.02 | 0.00896059 |
| 56999 | ADAMTS9 | 972.8 | 3354.49 | 1.78 | 5.86E-08 |
| 57214 | CEMIP | 90.81 | 818.2 | 3.17 | 2.42E-25 |
| 57282 | SLC4A10 | 1 | 50.8 | 5.66 | 1.90E-04 |
| 57453 | DSCAML1 | 196.95 | 612.52 | 1.63 | 7.91E-05 |
| 57460 | PPM1H | 8.35 | 66.18 | 2.98 | 9.44E-04 |
| 57574 | MARCHF4 | 8.47 | 336.77 | 5.31 | 1.10E-13 |
| 57611 | ISLR2 | 13.33 | 60.67 | 2.18 | 0.009851041 |
| 57616 | TSHZ3 | 2.98 | 46.65 | 3.96 | 3.28E-04 |
| 57758 | SCUBE2 | 110.36 | 367.8 | 1.73 | 0.01770377 |
| 5797 | PTPRM | 2.49 | 307.98 | 6.95 | 9.48E-16 |
| 5800 | PTPRO | 9.46 | 244.21 | 4.68 | 6.90E-14 |
| 5924 | RASGRF2 | 4.47 | 165.75 | 5.21 | 1.02E-13 |
| 59271 | EVA1C | 36.22 | 120.49 | 1.73 | 0.001782201 |
| 627 | BDNF | 1.49 | 51.71 | 5.11 | 7.39E-05 |
| 6347 | CCL2 | 3 | 235.06 | 6.29 | 1.12E-12 |
| 64084 | CLSTN2 | 0.5 | 24.23 | 5.61 | 0.0193649 |
| 64208 | POPDC3 | 85.78 | 265.3 | 1.62 | 9.50E-06 |
| 64283 | ARHGEF28 | 18.93 | 66.48 | 1.81 | 0.03591169 |
| 643699 | GOLGA8N | 550.67 | 2142.5 | 1.96 | 1.46E-20 |
| 644139 | PIRT | 42.15 | 199.23 | 2.24 | 5.76E-06 |
| 651746 | ANKRD33B | 58.05 | 198.74 | 1.77 | 6.31E-04 |
| 653061 | GOLGA8S | 80.25 | 490.94 | 2.61 | 6.76E-15 |
| 653075 | GOLGA8T | 15.85 | 100.75 | 2.66 | 1.96E-05 |
| 653720 | GOLGA8M | 176.58 | 734.79 | 2.05 | 1.19E-12 |
| 6538 | SLC6A11 | 344.97 | 1169.91 | 1.76 | 1.51E-13 |
| 6549 | SLC9A2 | 0.18 | 16.86 | 6.54 | 0.00889004 |
| 6641 | SNTB1 | 360.12 | 1105.43 | 1.61 | 7.76E-11 |
| 6653 | SORL1 | 1030.35 | 3387.27 | 1.71 | 6.00E-15 |
| 6819 | SULT1C2 | 4.45 | 61.72 | 3.79 | 5.22E-05 |
| 6869 | TACR1 | 1 | 25.17 | 4.64 | 0.015362439 |
| 692094 | MSMP | 15.17 | 5325.42 | 8.45 | 2.43E-12 |
| 7057 | THBS1 | 501.73 | 2382.5 | 2.24 | 8.71E-10 |
| 7164 | TPD52L1 | 9.95 | 126.77 | 3.67 | 1.62E-08 |
| 7222 | TRPC3 | 26.4 | 181.89 | 2.78 | 4.20E-09 |
| 7225 | TRPC6 | 2.48 | 23.63 | 3.25 | 0.03981002 |
| 727909 | GOLGA8Q | 0.18 | 33.21 | 7.51 | 3.12E-04 |
| 728047 | GOLGA8O | 51.58 | 184.02 | 1.83 | 3.94E-05 |
| 728498 | GOLGA8H | 109.57 | 739.51 | 2.75 | 1.36E-21 |
| 7504 | XK | 3.01 | 41.61 | 3.78 | 0.00220581 |
| 7700 | ZNF141 | 77.38 | 235.7 | 1.60 | 6.25E-04 |
| 783 | CACNB2 | 21.92 | 131.68 | 2.58 | 2.51E-06 |
| 79008 | SLX1B | 77.95 | 326.66 | 2.06 | 5.24E-05 |
| 79705 | LRRK1 | 30.81 | 322.79 | 3.38 | 3.61E-19 |
| 7980 | TFPI2 | 14.37 | 80.09 | 2.47 | 3.86E-04 |
| 79815 | NIPAL2 | 15.87 | 146.56 | 3.20 | 2.50E-09 |
| 79839 | CCDC102B | 326.57 | 1149.8 | 1.81 | 7.53E-14 |
| 79875 | THSD4 | 230.53 | 1643.69 | 2.83 | 1.80E-14 |
| 80005 | DOCK5 | 3.96 | 53.57 | 3.75 | 1.56E-04 |
| 80309 | SPHKAP | 1.98 | 97.31 | 5.62 | 1.88E-07 |
| 81035 | COLEC12 | 9.99 | 88.46 | 3.14 | 2.74E-05 |
| 8302 | KLRC4 | 13.84 | 66.83 | 2.27 | 0.00643415 |
| 837 | CASP4 | 3.45 | 33.21 | 3.26 | 0.01437356 |
| 83872 | HMCN1 | 0.18 | 18.33 | 6.66 | 0.00610991 |
| 8395 | PIP5K1B | 26.61 | 271.32 | 3.34 | 1.83E-12 |
| 84141 | EVA1A | 1.47 | 25.58 | 4.12 | 0.020700155 |
| 84557 | MAP1LC3A | 53.28 | 241.39 | 2.17 | 1.28E-06 |
| 84636 | GPR174 | 0.18 | 11.3 | 5.97 | 0.04323227 |
| 84674 | CARD6 | 5.03 | 33.08 | 2.71 | 0.045638515 |
| 84889 | SLC7A3 | 4.49 | 70.82 | 3.97 | 9.76E-06 |
| 85477 | SCIN | 28.49 | 150.67 | 2.40 | 2.05E-05 |
| 8633 | UNC5C | 265.59 | 1774.65 | 2.74 | 3.35E-15 |
| 8646 | CHRD | 53.85 | 336.59 | 2.64 | 1.59E-12 |
| 8788 | DLK1 | 1070 | 10366.92 | 3.27 | 1.57E-04 |
| 8792 | TNFRSF11A | 6.58 | 55.49 | 3.07 | 0.01746983 |
| 8809 | IL18R1 | 0.99 | 22.52 | 4.50 | 0.01722380 |
| 89832 | CHRFAM7A | 10.42 | 66.86 | 2.68 | 0.00102882 |
| 90134 | KCNH7 | 0.18 | 35.71 | 7.61 | 3.22E-04 |
| 91156 | IGFN1 | 16.39 | 174.29 | 3.41 | 2.91E-04 |
| 91522 | COL23A1 | 320.48 | 2560.12 | 2.99 | 0.00691108 |
| 9411 | ARHGAP29 | 20.72 | 590.95 | 4.83 | 8.48E-05 |
| 9547 | CXCL14 | 0.5 | 74.56 | 7.23 | 1.52E-04 |
| 9699 | RIMS2 | 109.43 | 563.45 | 2.36 | 4.48E-16 |
| 9771 | RAPGEF5 | 1112.84 | 4286.02 | 1.94 | 1.66E-07 |
| 9829 | DNAJC6 | 11.48 | 54.6 | 2.24 | 0.01240366 |

**Additional Table 5**
