# Supplementary material for: The GD3 ganglioside promotes cell growth, plasticity and chemotherapy resistance of human glioblastoma cancer stem cells
Source: Research Square preprint supplement (doi:10.21203/rs.3.rs-5246487/v1), 2025-03-31
Supplement: Supplementary file 2 [file 1e4560f57907a76b59fd683a.docx]

**LEGENDS OF ADDITIONAL FILES**

**Additional Figure 1:** *ST8SIA1* analyses in 491 samples from the TCGA database. **(A)** *ST8SIA1* expression in GBM (n=481) and non-tumor brain (n=10) samples. *: p<0.05. **(B)** Molecular alterations of *ST8SIA1* in GBM samples. **(C)** Overall survival of GBM patients according to *ST8SIA1* expression.

**Additional Figure 2: (A)** GD3 detection by flow cytometry on 4 freshly sorted patient samples to verify immunomagnetic purity of the GD3+ and GD3- fractions. Results are presented as % of positive cells. * *p* < 0.05. (**B**) Phase contrast images of GBM 302 and GBM 303 spheres at different passages (p0 and p5 for GBM 302; p6 and p8 for GBM 303). Scale bar = 100 m. (**C)** Detection of GD3 (red) expression by immunofluorescence on 10-days old floating spheres of GBM 303 cell line. Hoechst staining of the cell nuclei (blue) and merge are also shown. Scale bar = 50 m.

**Additional Figure 3:** *IL33* (left) and *ADAMTS1* (right)mRNA quantification by RT-qPCR in 5 independent samples of GBM6 shCTRL, GBM6 shS1 and GBM6 shS2, ** *p* < 0.01.

**Additional Figure 4:** **(A, B)** Analyses of putative co-targets of *IL33* and *ADAMTS1* genes in 491 samples from the TCGA database: differential expression between GBM (n=481) and non-tumor brain (n=10) (T-test) and prognostic value of gene expression (high *vs* low) on overall survival in GBM samples (log-rank test). **(C, D)** Association of the selected genes with IL33 and ADAMTS1 respectively, at the protein level (STRING analyses).

**Additional Figure 5: (A)** Colony assay of U251-shCTRL and U251-shST8SIA1 cell lines. Representative pictures for U251-shCTRL and U251-shS2. The graph displays quantification of colonies under treatment at 0 (DMSO), 5, 15 and 25 M concentrations of TMZ. ** *p* < 0.01. (**B)** Detection of γ-H2AX (red) expression by immunofluorescence on U251-shCTRL and U251-shST8SIA1 cell lines. Hoechst staining of the cell nuclei (blue) is also shown. Scale bar = 50 m. The graph (below) displays quantification of positive nuclei. (**C)** Detection of γ-H2AX (red) expression by immunofluorescence on LN229-shCTRL and LN229-shST8SIA1 cell lines. Hoechst staining of the cell nuclei (blue) is also shown. Scale bar = 50 m. The graph (below) displays quantification of positive nuclei. * *p* < 0.05. (**D)** Detection of γ-H2AX (red) expression by immunofluorescence on U87-shCTRL and U87-shST8SIA1 cell lines. Hoechst staining of the cell nuclei (blue) is also shown. Scale bar = 50 m. The graph (right) displays quantification of positive nuclei. * *p* < 0.05.

**Additional Table 1:** Patient characteristics from the TCGA database.

**Additional Table 2:** Significantly downregulated genes in GBM9 shS1 cells relative to GBM9 shCTRL cells (Log2 FC < 1.585 and Q-value < 0.05).

**Additional Table 3:** Significantly upregulated genes in GBM9 shS1 cells relative to GBM9 shCTRL cells (Log2 FC > 1.585 and Q-value < 0.05).

**Additional Table 4:** Significantly downregulated genes in GBM9 shS2 cells relative to GBM9 shCTRL cells (Log2 FC < 1.585 and Q-value < 0.05).

**Additional Table 5:** Significantly upregulated genes in GBM9 shS2 cells relative to GBM9 shCTRL cells (Log2 FC > 1.585 and Q-value < 0.05).
