# Supplementary material for: The GD3 ganglioside promotes cell growth, plasticity and chemotherapy resistance of human glioblastoma cancer stem cells
Source: Research Square preprint supplement (doi:10.21203/rs.3.rs-5246487/v1), 2025-03-31
Supplement: Supplementary file 3 [file 44f8e6f42f300d3092a326de.docx]

| **Gene ID** | **Gene Symbol** | **shCTRL average Read Count** | **shS1 average Read Count** | **Log2 (shS1 / shCTRL)** | **Qvalue (shS1 / shCTRL)** |
| --- | --- | --- | --- | --- | --- |
| 106865373 | GET1-SH3BGR | 34,42 | 0,19 | -7,528114267 | 0,001849772 |
| 1295 | COL8A1 | 105,43 | 19,97 | -2,400054535 | 0,007447515 |
| 1373 | CPS1 | 391,9 | 129,96 | -1,592373676 | 1,21E-04 |
| 139411 | PTCHD1 | 132,82 | 25,53 | -2,379337376 | 2,03E-04 |
| 1607 | DGKB | 269,33 | 54,15 | -2,314433577 | 2,09E-07 |
| 1630 | DCC | 189,54 | 60,64 | -1,644199815 | 0,001415718 |
| 1641 | DCX | 436,01 | 133,08 | -1,712073963 | 1,66E-05 |
| 200150 | PLD5 | 528,78 | 165,09 | -1,67944272 | 6,76E-08 |
| 23026 | MYO16 | 144,7 | 41,88 | -1,788871098 | 0,008226427 |
| 23108 | RAP1GAP2 | 256,76 | 84,24 | -1,607787481 | 0,017796721 |
| 24141 | LAMP5 | 209,11 | 60,15 | -1,79763151 | 0,023563912 |
| 2587 | GALR1 | 198,09 | 55,35 | -1,839578444 | 0,040304678 |
| 30845 | EHD3 | 996,84 | 323,48 | -1,623686787 | 4,66E-09 |
| 338645 | LUZP2 | 228,63 | 61,89 | -1,885345833 | 1,13E-04 |
| 3765 | KCNJ9 | 218,56 | 65,39 | -1,741015955 | 1,47E-04 |
| 388 | RHOB | 4333,22 | 1173,28 | -1,884889495 | 9,11E-09 |
| 402665 | IGLON5 | 150,95 | 32,94 | -2,196195506 | 0,034735433 |
| 4135 | MAP6 | 2019,72 | 611,91 | -1,722771339 | 1,65E-11 |
| 4773 | NFATC2 | 102,01 | 27,45 | -1,894121877 | 0,01176692 |
| 5137 | PDE1C | 7753,18 | 2429,72 | -1,673998934 | 9,11E-08 |
| 57689 | LRRC4C | 164,93 | 30,75 | -2,423099706 | 1,08E-04 |
| 57863 | CADM3 | 174,41 | 25,06 | -2,799047538 | 2,09E-07 |
| 6335 | SCN9A | 55,76 | 10,69 | -2,382326801 | 0,030178092 |
| 6480 | ST6GAL1 | 725,98 | 227,39 | -1,674760248 | 2,52E-04 |
| 6546 | SLC8A1 | 40,79 | 2,54 | -4,006609466 | 0,010418274 |
| 6588 | SLN | 492,95 | 102,52 | -2,265544182 | 3,55E-04 |
| 79054 | TRPM8 | 7452,7 | 2293,72 | -1,700076248 | 4,75E-08 |
| 815 | CAMK2A | 119,59 | 25,94 | -2,205102908 | 0,001071245 |
| 81551 | STMN4 | 902,41 | 62,97 | -3,841008311 | 8,95E-11 |
| 81606 | LBH | 437,49 | 130,89 | -1,740841435 | 1,95E-06 |
| 8363 | H4C11 | 26,81 | 0,19 | -7,169891484 | 0,005716915 |
| 90865 | IL33 | 189,72 | 51,54 | -1,880214558 | 7,35E-05 |
| 9379 | NRXN2 | 1507,57 | 202,77 | -2,894301178 | 5,20E-14 |
| 9472 | AKAP6 | 581,65 | 141,41 | -2,040233198 | 2,29E-11 |
| 9510 | ADAMTS1 | 1308,9 | 311,16 | -2,072604143 | 1,79E-12 |
| 9674 | KIAA0040 | 402,43 | 110,38 | -1,866217431 | 0,001833226 |

**Additional Table 2**
