# Supplementary material for: The GD3 ganglioside promotes cell growth, plasticity and chemotherapy resistance of human glioblastoma cancer stem cells
Source: Research Square preprint supplement (doi:10.21203/rs.3.rs-5246487/v1), 2025-03-31
Supplement: Supplementary file 4 [file 4c936f3c8aa7a6281e8cffaa.docx]

| **Gene ID** | **Gene Symbol** | **shCTRL average Read Count** | **shS1 average Read Count** | **Log2 (shS1/ shCTRL)** | **Qvalue (shS1 / shCTRL)** |
| --- | --- | --- | --- | --- | --- |
| 106821730 | BUB1B-PAK6 | 0.18 | 37.51 | 7.72 | 6.73374E-4 |
| 121601 | ANO4 | 13.57 | 69.67 | 2.36 | 0.010498373 |
| 1305 | COL13A1 | 23.5 | 107.57 | 2.19 | 0.001868532 |
| 137970 | UNC5D | 99.24 | 343.42 | 6.15 | 1.9497055E-6 |
| 152789 | JAKMIP1 | 67.43 | 219.04 | 1.70 | 2.5177517E-4 |
| 168544 | ZNF467 | 35.34 | 145.39 | 2.04 | 0.003690416 |
| 170692 | ADAMTS18 | 2.9 | 85.65 | 4.88 | 1.245443E-6 |
| 201501 | ZBTB7C | 5.32 | 89.18 | 4.07 | 1.949705E-6 |
| 220 | ALDH1A3 | 5.34 | 45.57 | 3.09 | 0.02140967 |
| 2202 | EFEMP1 | 4.38 | 43.92 | 3.33 | 0.00744751 |
| 22918 | CD93 | 3.42 | 34.44 | 3.33 | 0.04763910 |
| 23550 | PSD4 | 31.99 | 142.04 | 2.15 | 0.00134788 |
| 255743 | NPNT | 400.99 | 1479.05 | 1.88 | 4.684384E-6 |
| 283316 | CD163L1 | 10.78 | 166.14 | 3.95 | 1.1695934E-10 |
| 339366 | ADAMTSL5 | 26.4 | 102.36 | 1.95 | 0.0082264 |
| 342184 | FMN1 | 168.26 | 600.06 | 1.83 | 2.5799659E-6 |
| 347902 | AMIGO2 | 3.9 | 51.91 | 3.74 | 9.8088045E-4 |
| 3856 | KRT8 | 19.03 | 84.74 | 2.15 | 0.01611264 |
| 3875 | KRT18 | 21.82 | 97.01 | 2.15 | 0.04498079 |
| 389903 | CSAG3 | 17.69 | 81.56 | 2.20 | 0.03573886 |
| 4143 | MAT1A | 48.28 | 165.8 | 1.78 | 0.00211675 |
| 5029 | P2RY2 | 36.22 | 167.45 | 2.21 | 5.5143114E-5 |
| 5069 | PAPPA | 93.22 | 559.22 | 2.58 | 4.6635283E-9 |
| 5104 | SERPINA5 | 29.4 | 111.49 | 1.92 | 0.04574178 |
| 51046 | ST8SIA3 | 14.32 | 152.02 | 3.41 | 2.6849645E-4 |
| 51363 | CHST15 | 0.49 | 31.28 | 6.00 | 0.04281048 |
| 5325 | PLAGL1 | 13.66 | 147.13 | 3.43 | 3.9926501E-9 |
| 54626 | HES2 | 57.12 | 178.63 | 1.64 | 0.00150432 |
| 56849 | TCEAL7 | 104.96 | 362.31 | 1.79 | 3.8375829E-6 |
| 57460 | 'PPM1H' | 8.18 | 50.85 | 2.64 | 0.04498079 |
| 57834 | 'CYP4F11' | 49.18 | 281.76 | 2.52 | 8.5975930E-11 |
| 641700 | 'ECSCR' | 31.05 | 106.51 | 1.78 | 0.01176691 |
| 651746 | 'ANKRD33B' | 56.96 | 181.81 | 1.67 | 0.00943581 |
| 6710 | 'SPTB' | 46.76 | 207.83 | 2.15 | 1.24635787E-5 |
| 6819 | 'SULT1C2' | 4.36 | 57.09 | 3.71 | 5.14409726E-4 |
| 692094 | MSMP' | 14.92 | 575.95 | 5.27 | 2.34589136E-16 |
| 7127 | TNFAIP2 | 60.71 | 279.61 | 2.20 | 4.19919871E-6 |
| 727909 | GOLGA8Q | 0.18 | 23.07 | 7.02 | 0.01270033 |
| 8395 | PIP5K1B | 26.07 | 163.95 | 2.65 | 8.37721142E-6 |
| 8534 | CHST1 | 274.69 | 843.08 | 1.62 | 1.55831060E-4 |
| 9547 | CXCL14 | 0.49 | 89.5 | 7.52 | 3.78484917E-4 |
| 9843 | HEPH | 21.21 | 108.49 | 2.35 | 0.00944433 |

**Additional Table 3**
