# Supplementary material for: The GD3 ganglioside promotes cell growth, plasticity and chemotherapy resistance of human glioblastoma cancer stem cells
Source: Research Square preprint supplement (doi:10.21203/rs.3.rs-5246487/v1), 2025-03-31
Supplement: Supplementary file 5 [file 8cafbb678cdbd3fb561ebca8.docx]

| **Gene ID** | **Gene Symbol** | **shCTRL average Read Count** | **shS2 average Read Count** | **log2 (shS2 / shCTRL)** | **Qvalue (shS2 / shCTRL)** |
| --- | --- | --- | --- | --- | --- |
| 100506164 | HSFX1 | 63,41 | 12,59 | -2,33 | 0,00960395 |
| 100507055 | LRCOL1 | 46,41 | 11,04 | -2,07 | 0,0367867 |
| 100529144 | CORO7-PAM16 | 22,02 | 0,18 | -6,91 | 0,00409537 |
| 10333 | TLR6 | 52,19 | 8,96 | -2,54 | 0,01439422 |
| 10382 | TUBB4A | 929,6 | 144,97 | -2,68 | 2,95E-20 |
| 10397 | NDRG1 | 11809,37 | 3188,47 | -1,88 | 2,50E-06 |
| 10447 | FAM3C | 4988,92 | 1644,01 | -1,60 | 1,48E-19 |
| 10457 | GPNMB | 289,51 | 86,69 | -1,73 | 2,69E-04 |
| 10501 | SEMA6B | 313,23 | 92,2 | -1,76 | 3,13E-06 |
| 10690 | FUT9 | 219,85 | 35,72 | -2,62 | 8,52E-05 |
| 10900 | RUNDC3A | 345,83 | 78,72 | -2,13 | 1,44E-10 |
| 10964 | IFI44L | 296,82 | 53,22 | -2,47 | 3,36E-09 |
| 11025 | LILRB3 | 27,82 | 1 | -4,80 | 0,0182978 |
| 111089941 | MMP24-AS1-EDEM2 | 59,41 | 12,62 | -2,23 | 0,04576315 |
| 1116 | CHI3L1 | 1322,6 | 41,18 | -5,00 | 5,03E-05 |
| 11189 | CELF3 | 207,89 | 16,53 | -3,65 | 3,14E-14 |
| 112441426 | TMEM271 | 103,05 | 32,58 | -1,66 | 0,00621399 |
| 11250 | GPR45 | 24,87 | 2 | -3,63 | 0,02022957 |
| 114548 | NLRP3 | 126,53 | 23,61 | -2,42 | 1,92E-05 |
| 114783 | LMTK3 | 807,78 | 107,36 | -2,91 | 2,22E-17 |
| 1154 | CISH | 85,85 | 28,58 | -1,58 | 0,02481029 |
| 115701 | ALPK2 | 782,05 | 103,43 | -2,91 | 2,37E-07 |
| 1159 | CKMT1B | 45,38 | 5,51 | -3,04 | 0,01547119 |
| 116372 | LYPD1 | 1335,19 | 207,26 | -2,68 | 1,47E-29 |
| 117854 | TRIM6 | 39,49 | 5,46 | -2,85 | 0,02304571 |
| 124961 | ZFP3 | 63,56 | 14,09 | -2,17 | 0,00994708 |
| 126306 | JSRP1 | 43,05 | 3,03 | -3,83 | 0,00240808 |
| 1264 | CNN1 | 81,95 | 24,48 | -1,74 | 0,02385216 |
| 1265 | CNN2 | 623,23 | 198,74 | -1,64 | 3,01E-07 |
| 1271 | CNTFR | 857,89 | 200,51 | -2,09 | 5,69E-13 |
| 127343 | DMBX1 | 56,08 | 0,18 | -8,25 | 2,48E-05 |
| 1277 | COL1A1 | 208,44 | 56,77 | -1,87 | 5,52E-04 |
| 1293 | COL6A3 | 779,74 | 36,93 | -4,40 | 2,15E-04 |
| 131034 | CPNE4 | 1161,14 | 208,81 | -2,47 | 1,57E-20 |
| 133121 | ENPP6 | 165,52 | 44,17 | -1,90 | 6,35E-05 |
| 139728 | PNCK | 392,8 | 120,32 | -1,70 | 0,01469896 |
| 139735 | ZFP92 | 114,5 | 15,46 | -2,88 | 3,22E-05 |
| 1404 | HAPLN1 | 11,2 | 0,18 | -5,94 | 0,04410819 |
| 140685 | ZBTB46 | 299,03 | 83,89 | -1,83 | 4,55E-05 |
| 1463 | NCAN | 41933,79 | 5942,45 | -2,81 | 2,04E-33 |
| 147645 | VSIG10L | 114,72 | 18,71 | -2,61 | 0,00178187 |
| 148398 | SAMD11 | 406,65 | 73,86 | -2,46 | 4,08E-07 |
| 148641 | SLC35F3 | 137,5 | 35,25 | -1,96 | 0,00210418 |
| 1489 | CTF1 | 46,59 | 2,51 | -4,21 | 2,61E-04 |
| 151449 | GDF7 | 209,67 | 53,98 | -1,95 | 5,74E-06 |
| 151651 | EFHB | 82,29 | 22,52 | -1,86 | 0,00854758 |
| 154796 | AMOT | 2724,95 | 843,48 | -1,69 | 9,04E-12 |
| 158326 | FREM1 | 598,5 | 138,79 | -2,10 | 2,34E-14 |
| 161145 | TMEM229B | 456,33 | 130,37 | -1,80 | 7,03E-06 |
| 1630 | DCC | 193,25 | 55,08 | -1,81 | 4,45E-05 |
| 1641 | DCX | 444,61 | 54,67 | -3,02 | 8,96E-21 |
| 1646 | AKR1C2 | 79,95 | 14,11 | -2,50 | 0,00640385 |
| 165186 | TOGARAM2 | 52,76 | 14,54 | -1,85 | 0,03796447 |
| 169611 | OLFML2A | 441,05 | 146,99 | -1,58 | 0,02015059 |
| 170261 | ZCCHC12 | 528,41 | 78,53 | -2,75 | 3,72E-20 |
| 176 | ACAN | 1678,76 | 246,08 | -2,77 | 7,49E-10 |
| 1770 | DNAH9 | 1973,1 | 563,9 | -1,80 | 9,91E-16 |
| 1804 | DPP6 | 3197,51 | 1049,52 | -1,60 | 4,47E-05 |
| 1836 | SLC26A2 | 4116,19 | 1226,53 | -1,74 | 5,18E-09 |
| 1852 | DUSP9 | 47,63 | 10,5 | -2,18 | 0,02192601 |
| 196385 | DNAH10 | 301,76 | 86,18 | -1,80 | 2,05E-07 |
| 1995 | ELAVL3 | 1439,84 | 323,48 | -2,15 | 3,57E-09 |
| 202374 | STK32A | 80,37 | 26,16 | -1,61 | 0,04974879 |
| 203427 | SLC25A43 | 204,69 | 20,4 | -3,32 | 1,46E-08 |
| 2039 | DMTN | 553,55 | 178,34 | -1,63 | 1,26E-04 |
| 2134 | EXTL1 | 529,85 | 93 | -2,51 | 1,18E-13 |
| 2185 | PTK2B | 2102,65 | 477,46 | -2,13 | 1,68E-21 |
| 219293 | ATAD3C | 349,13 | 54,11 | -2,68 | 8,04E-07 |
| 219670 | ENKUR | 383,48 | 83,63 | -2,19 | 9,10E-12 |
| 220296 | HEPACAM | 165,77 | 37,44 | -2,14 | 0,0154025 |
| 221692 | PHACTR1 | 401,21 | 115,66 | -1,79 | 4,56E-09 |
| 222663 | SCUBE3 | 99,06 | 22,5 | -2,13 | 0,0060384 |
| 225689 | MAPK15 | 167,63 | 19 | -3,14 | 5,86E-08 |
| 22807 | IKZF2 | 246,86 | 71,98 | -1,77 | 7,79E-06 |
| 230 | ALDOC | 2538,54 | 735,54 | -1,78 | 2,08E-08 |
| 23017 | FAIM2 | 1736,5 | 289,34 | -2,58 | 7,49E-28 |
| 23037 | PDZD2 | 440,54 | 86,75 | -2,34 | 1,03E-05 |
| 23096 | IQSEC2 | 504,37 | 139,5 | -1,85 | 5,32E-10 |
| 23108 | RAP1GAP2 | 261,76 | 57,16 | -2,19 | 2,25E-06 |
| 23136 | EPB41L3 | 838,83 | 49,86 | -4,07 | 1,68E-21 |
| 23148 | NACAD | 4461,88 | 1466,5 | -1,60 | 7,43E-13 |
| 23205 | ACSBG1 | 1632,81 | 275,71 | -2,56 | 4,42E-26 |
| 23217 | ZFR2 | 28,95 | 1,51 | -4,26 | 0,0069101 |
| 23416 | KCNH3 | 1323,91 | 356,41 | -1,89 | 6,68E-13 |
| 23475 | QPRT | 531,98 | 164,03 | -1,69 | 3,65E-04 |
| 23493 | HEY2 | 1189,27 | 285,51 | -2,05 | 1,12E-06 |
| 238 | ALK | 1006,35 | 321,53 | -1,64 | 5,12E-12 |
| 24141 | LAMP5 | 213,15 | 31,16 | -2,77 | 1,34E-08 |
| 2587 | GALR1 | 201,84 | 25,65 | -2,97 | 5,10E-06 |
| 25992 | SNED1 | 829,02 | 241,87 | -1,77 | 1,53E-05 |
| 26022 | TMEM98 | 34,79 | 5,02 | -2,79 | 0,0189145 |
| 260429 | PRSS33 | 41,09 | 3,52 | -3,54 | 0,0038853 |
| 2683 | B4GALT1 | 342,35 | 55,95 | -2,61 | 2,15E-10 |
| 2705 | GJB1 | 154,74 | 41,16 | -1,91 | 2,93E-04 |
| 27324 | TOX3 | 78,91 | 26,02 | -1,60 | 0,0348935 |
| 283152 | CCDC153 | 43,68 | 8,05 | -2,43 | 0,0327728 |
| 283212 | KLHL35 | 37,81 | 7,99 | -2,24 | 0,0461298 |
| 283971 | CLEC18C | 80,42 | 16,07 | -2,32 | 0,0011043 |
| 2842 | GPR19 | 168,71 | 55,64 | -1,60 | 7,88E-04 |
| 284297 | SSC5D | 136 | 20,63 | -2,72 | 1,33E-05 |
| 284353 | NKPD1 | 87,67 | 24,64 | -1,83 | 0,0190563 |
| 2900 | GRIK4 | 740,29 | 151,71 | -2,28 | 2,19E-17 |
| 29933 | GPR132 | 62,42 | 11,61 | -2,42 | 0,0270143 |
| 3067 | HDC | 133,69 | 7,02 | -4,25 | 1,43E-09 |
| 30819 | KCNIP2 | 523,45 | 166,32 | -1,65 | 9,14E-09 |
| 30845 | EHD3 | 1016,45 | 275,26 | -1,88 | 2,85E-16 |
| 333 | APLP1 | 1292,57 | 341,19 | -1,92 | 3,70E-07 |
| 3352 | HTR1D | 43,82 | 7,52 | -2,54 | 0,01219263 |
| 3371 | TNC | 61876,94 | 15062,15 | -2,03 | 0,02701432 |
| 338382 | RAB7B | 386,58 | 107,14 | -1,85 | 4,55E-09 |
| 340596 | LHFPL1 | 63,87 | 9,1 | -2,81 | 0,0301141 |
| 342865 | VSTM2B | 36,78 | 4,52 | -3,02 | 0,0219213 |
| 349667 | RTN4RL2 | 292,16 | 84,7 | -1,78 | 1,70E-04 |
| 3556 | IL1RAP | 7248,78 | 1009,72 | -2,84 | 7,48E-36 |
| 3598 | IL13RA2 | 267,82 | 9,5 | -4,81 | 3,11E-21 |
| 360200 | TMPRSS9 | 104,37 | 12,05 | -3,11 | 0,0014383 |
| 3624 | INHBA | 462,37 | 114,33 | -2,01 | 8,12E-05 |
| 363 | AQP6 | 80,05 | 11,04 | -2,85 | 7,31E-05 |
| 375190 | FAM228B | 340,76 | 100,7 | -1,75 | 2,17E-04 |
| 375607 | NAT16 | 496,29 | 155,87 | -1,67 | 0,0010294 |
| 375612 | LHFPL3 | 487,65 | 86,89 | -2,48 | 4,92E-09 |
| 3765 | KCNJ9 | 222,89 | 28,09 | -2,98 | 5,06E-12 |
| 3785 | KCNQ2 | 1334,65 | 200,52 | -2,73 | 5,89E-21 |
| 387856 | CCDC184 | 646,38 | 113,45 | -2,51 | 4,03E-16 |
| 388 | RHOB | 4421,18 | 786,57 | -2,49 | 6,19E-18 |
| 389073 | C2orf80 | 255,73 | 51,1 | -2,32 | 2,30E-06 |
| 3897 | L1CAM | 290,72 | 23,64 | -3,62 | 1,38E-06 |
| 400961 | PAIP2B | 102,9 | 14,94 | -2,78 | 2,33E-04 |
| 402665 | IGLON5 | 153,79 | 7,52 | -4,35 | 1,97E-09 |
| 4135 | MAP6 | 2060,11 | 387,99 | -2,40 | 2,96E-19 |
| 4237 | MFAP2 | 98,45 | 17,57 | -2,48 | 9,16E-05 |
| 4293 | MAP3K9 | 662,91 | 133,24 | -2,31 | 2,33E-17 |
| 4355 | MPP2 | 610,68 | 198,08 | -1,62 | 2,50E-08 |
| 441869 | ANKRD65 | 670,74 | 87,47 | -2,93 | 1,25E-20 |
| 4647 | MYO7A | 626,58 | 72,02 | -3,12 | 3,70E-09 |
| 4661 | MYT1 | 73,03 | 20,08 | -1,86 | 0,0204596 |
| 477 | ATP1A2 | 115,01 | 5,01 | -4,52 | 7,45E-10 |
| 4773 | NFATC2 | 104,03 | 12,46 | -3,06 | 1,37E-05 |
| 4815 | NINJ2 | 200,1 | 41,59 | -2,26 | 4,67E-06 |
| 4837 | NNMT | 148,25 | 23,37 | -2,66 | 7,92E-04 |
| 489 | ATP2A3 | 213,59 | 44,05 | -2,27 | 3,67E-06 |
| 4920 | ROR2 | 40,88 | 5,04 | -3,02 | 0,0082322 |
| 4985 | OPRD1 | 142,29 | 24,98 | -2,50 | 2,56E-05 |
| 50615 | IL21R | 163,15 | 40,16 | -2,02 | 0,03339248 |
| 5063 | PAK3 | 1074,64 | 275,86 | -1,96 | 2,19E-18 |
| 50937 | CDON | 2040,85 | 513,64 | -1,99 | 1,05E-14 |
| 5104 | SERPINA5 | 29,96 | 3,5 | -3,09 | 0,02725477 |
| 5143 | PDE4C | 373,12 | 74,5 | -2,32 | 4,46E-06 |
| 51438 | MAGEC2 | 1427,02 | 321,71 | -2,14 | 2,56E-24 |
| 5155 | PDGFB | 52,49 | 5,52 | -3,24 | 9,61E-04 |
| 51702 | PADI3 | 76,84 | 2 | -5,26 | 1,14E-06 |
| 5327 | PLAT | 4173,83 | 1169,22 | -1,83 | 1,36E-12 |
| 53335 | BCL11A | 58,27 | 9,53 | -2,61 | 0,0022368 |
| 5354 | PLP1 | 1708,15 | 273,97 | -2,64 | 5,06E-16 |
| 54329 | GPR85 | 30,26 | 0,18 | -7,36 | 6,19E-04 |
| 54768 | HYDIN | 164,18 | 17,03 | -3,26 | 1,18E-10 |
| 54855 | TENT5C | 87,57 | 26,92 | -1,70 | 0,0228960 |
| 548596 | CKMT1A | 45,59 | 2,48 | -4,20 | 0,0030969 |
| 54869 | EPS8L1 | 180,77 | 38,57 | -2,22 | 6,08E-06 |
| 55026 | TMEM255A | 2524,19 | 389,72 | -2,69 | 6,92E-31 |
| 55061 | SUSD4 | 266,11 | 65,28 | -2,02 | 6,93E-07 |
| 55076 | TMEM45A | 720,99 | 215,36 | -1,74 | 2,31E-10 |
| 55313 | CPPED1 | 290,48 | 50,55 | -2,52 | 2,71E-11 |
| 5549 | PRELP | 230,87 | 53,2 | -2,11 | 0,0188971 |
| 55638 | SYBU | 234,05 | 41,74 | -2,48 | 4,84E-08 |
| 55806 | HR | 300,77 | 95,38 | -1,65 | 1,29E-05 |
| 55879 | GABRQ | 610,87 | 57,24 | -3,41 | 8,05E-16 |
| 55959 | SULF2 | 6858,69 | 1651,28 | -2,05 | 6,68E-13 |
| 56245 | C21orf62 | 1498,06 | 481,2 | -1,63 | 1,01E-12 |
| 5662 | PSD | 1172,18 | 283,18 | -2,04 | 2,30E-17 |
| 56937 | PMEPA1 | 2108,95 | 526,14 | -2,00 | 5,01E-11 |
| 57010 | CABP4 | 262,54 | 23,56 | -3,47 | 6,25E-16 |
| 57121 | LPAR5 | 31,26 | 1 | -4,96 | 0,0031906 |
| 57134 | MAN1C1 | 2131,75 | 661,82 | -1,68 | 1,75E-14 |
| 57211 | ADGRG6 | 1263,71 | 404,71 | -1,64 | 6,11E-12 |
| 57447 | NDRG2 | 428,68 | 126,37 | -1,76 | 5,33E-07 |
| 57509 | MTUS1 | 211,67 | 65,45 | -1,69 | 4,28E-04 |
| 57575 | PCDH10 | 7205,93 | 1128,35 | -2,67 | 9,40E-46 |
| 57578 | UNC79 | 553,73 | 105,38 | -2,39 | 1,13E-12 |
| 57595 | PDZD4 | 1994,65 | 421,17 | -2,24 | 6,81E-11 |
| 57604 | TRMT9B | 164,1 | 5,03 | -5,02 | 2,53E-12 |
| 57689 | LRRC4C | 168,11 | 24,1 | -2,80 | 5,97E-08 |
| 5778 | PTPN7 | 33,36 | 3,5 | -3,25 | 0,0158274 |
| 57863 | CADM3 | 177,84 | 52,49 | -1,7 | 0,0061099 |
| 5791 | PTPRE | 1034,63 | 344,44 | -1,58 | 6,76E-08 |
| 59284 | CACNG7 | 2943,8 | 284,38 | -3,37 | 3,07E-54 |
| 5973 | RENBP | 301,99 | 35,06 | -3,10 | 3,90E-08 |
| 6006 | RHCE | 58,93 | 13,01 | -2,17 | 0,0378988 |
| 60680 | CELF5 | 105,98 | 28,63 | -1,88 | 0,0041766 |
| 6121 | RPE65 | 604,63 | 93,6 | -2,69 | 2,35E-18 |
| 6253 | RTN2 | 200,82 | 60,94 | -1,72 | 1,32E-04 |
| 631 | BFSP1 | 394,28 | 75,32 | -2,38 | 9,10E-10 |
| 6323 | SCN1A | 2380,46 | 406 | -2,55 | 4,87E-19 |
| 6328 | SCN3A | 1788,94 | 501,75 | -1,83 | 1,06E-10 |
| 633 | BGN | 883 | 105,86 | -3,06 | 1,55E-11 |
| 6330 | SCN4B | 130,47 | 33,37 | -1,96 | 0,0095902 |
| 6340 | SCNN1G | 51,56 | 5,51 | -3,22 | 0,0075676 |
| 63827 | BCAN | 1972,11 | 560,58 | -1,81 | 2,42E-09 |
| 642574 | IQANK1 | 26,33 | 2,52 | -3,38 | 0,0290728 |
| 64856 | VWA1 | 2507,29 | 834,86 | -1,58 | 7,51E-09 |
| 6515 | SLC2A3 | 10754,02 | 2641,55 | -2,02 | 0,0266738 |
| 65266 | WNK4 | 222,39 | 69,21 | -1,68 | 0,0028328 |
| 655 | BMP7 | 1112,04 | 134,82 | -3,04 | 6,69E-26 |
| 6588 | SLN | 502,35 | 22,1 | -4,50 | 6,14E-17 |
| 65997 | RASL11B | 222,05 | 32,55 | -2,77 | 3,48E-11 |
| 6725 | SRMS | 42,91 | 7,09 | -2,59 | 0,0445774 |
| 6753 | SSTR3 | 42,65 | 7,54 | -2,49 | 0,0401137 |
| 6781 | STC1 | 163,19 | 42,65 | -1,93 | 5,43E-04 |
| 6855 | SYP | 441,14 | 115,31 | -1,93 | 8,26E-10 |
| 6861 | SYT5 | 73,87 | 16,04 | -2,20 | 0,0056814 |
| 6866 | TAC3 | 47,85 | 7,02 | -2,76 | 0,0151801 |
| 6900 | CNTN2 | 2090,26 | 598,3 | -1,80 | 1,68E-09 |
| 7045 | TGFBI | 218,44 | 28,42 | -2,94 | 7,44E-07 |
| 7052 | TGM2 | 356,9 | 67,95 | -2,39 | 2,77E-11 |
| 7078 | TIMP3 | 1249,99 | 50,88 | -4,61 | 5,12E-35 |
| 7123 | CLEC3B | 100,5 | 4,51 | -4,47 | 4,02E-08 |
| 7145 | TNS1 | 2151,26 | 194,99 | -3,46 | 2,89E-46 |
| 719 | C3AR1 | 141,08 | 25,83 | -2,44 | 0,0026024 |
| 726 | CAPN5 | 14609,26 | 4307,32 | -1,76 | 2,14E-10 |
| 729956 | SHISA7 | 110,59 | 9,99 | -3,46 | 1,40E-06 |
| 7421 | VDR | 181,19 | 55,43 | -1,70 | 7,74E-04 |
| 7464 | CORO2A | 145 | 42 | -1,78 | 3,98E-04 |
| 7482 | WNT2B | 312,67 | 93,83 | -1,73 | 0,0383363 |
| 753 | LDLRAD4 | 894,42 | 67,36 | -3,73 | 3,00E-29 |
| 778 | CACNA1F | 12,38 | 0,18 | -6,08 | 0,0349507 |
| 79054 | TRPM8 | 7602,1 | 581,81 | -3,70 | 2,81E-44 |
| 79883 | PODNL1 | 224,86 | 40,02 | -2,49 | 2,42E-09 |
| 80127 | BBOF1 | 108,55 | 33,68 | -1,68 | 0,0077729 |
| 80216 | ALPK1 | 393,83 | 104,1 | -1,91 | 1,80E-09 |
| 80832 | APOL4 | 121,66 | 38,81 | -1,64 | 0,0201629 |
| 80852 | GRIP2 | 383,23 | 110,9 | -1,78 | 6,46E-04 |
| 8120 | AP3B2 | 389,57 | 94,31 | -2,04 | 1,56E-09 |
| 815 | CAMK2A | 122,01 | 7,01 | -4,12 | 1,39E-09 |
| 81551 | STMN4 | 919,24 | 12,05 | -6,25 | 3,03E-25 |
| 8190 | MIA | 81,31 | 5,03 | -4,01 | 3,80E-05 |
| 8224 | SYN3 | 268,19 | 38,64 | -2,79 | 1,72E-10 |
| 8291 | DYSF | 526,72 | 91,65 | -2,52 | 1,08E-18 |
| 83593 | RASSF5 | 498,75 | 162,94 | -1,61 | 0,0016438 |
| 83694 | RPS6KL1 | 121,59 | 28,44 | -2,09 | 7,37E-04 |
| 83733 | SLC25A18 | 380,4 | 119,7 | -1,66 | 1,59E-07 |
| 84070 | FAM186B | 105,13 | 16,48 | -2,67 | 2,43E-04 |
| 84168 | ANTXR1 | 3695,35 | 1150,61 | -1,68 | 2,45E-17 |
| 84187 | TMEM164 | 2272,97 | 705,21 | -1,68 | 3,38E-11 |
| 84229 | DRC7 | 56,49 | 7,02 | -3,00 | 0,0011521 |
| 84467 | FBN3 | 200,2 | 58,36 | -1,77 | 0,0014735 |
| 8447 | DOC2B | 2403,91 | 332,13 | -2,85 | 0,0356078 |
| 84628 | NTNG2 | 289,22 | 94,6 | -1,61 | 8,36E-06 |
| 84630 | TTBK1 | 899,21 | 139,84 | -2,68 | 3,37E-17 |
| 84824 | FCRLA | 480,12 | 152,75 | -1,65 | 4,30E-04 |
| 84929 | FIBCD1 | 208,32 | 57,94 | -1,84 | 4,47E-05 |
| 85016 | CFAP300 | 66,65 | 20,05 | -1,73 | 0,0330440 |
| 8515 | ITGA10 | 1151,84 | 328,86 | -1,80 | 1,75E-05 |
| 85300 | ATCAY | 2744,96 | 204,25 | -3,74 | 5,88E-32 |
| 85449 | KIAA1755 | 542,48 | 107,29 | -2,33 | 1,68E-09 |
| 864 | RUNX3 | 1434,48 | 108,27 | -3,72 | 5,23E-35 |
| 8857 | FCGBP | 273,8 | 87,98 | -1,63 | 2,10E-04 |
| 8906 | AP1G2 | 787,82 | 249,53 | -1,65 | 4,47E-09 |
| 8991 | SELENBP1 | 39,26 | 2 | -4,29 | 0,0010622 |
| 9001 | HAP1 | 903,62 | 142,07 | -2,66 | 8,14E-10 |
| 90288 | EFCAB12 | 78,03 | 22,57 | -1,78 | 0,0111309 |
| 90342 | FER1L5 | 87,57 | 5,03 | -4,12 | 1,72E-06 |
| 90865 | IL33 | 193,51 | 24,13 | -3,00 | 1,07E-09 |
| 9118 | INA | 864,83 | 279,24 | -1,63 | 5,33E-07 |
| 9122 | SLC16A4 | 285,08 | 52,62 | -2,43 | 9,32E-10 |
| 9123 | SLC16A3 | 362,8 | 95,51 | -1,92 | 1,32E-04 |
| 91409 | CCDC74B | 258,31 | 84,13 | -1,61 | 2,78E-05 |
| 9148 | NEURL1 | 519,42 | 139,48 | -1,89 | 2,09E-10 |
| 92293 | TMEM132C | 742,13 | 225,48 | -1,71 | 1,96E-09 |
| 9256 | TSPOAP1 | 346,06 | 27,15 | -3,67 | 4,95E-10 |
| 92749 | DRC1 | 121,82 | 18,96 | -2,68 | 1,42E-04 |
| 9379 | NRXN2 | 1536,62 | 40,24 | -5,25 | 5,20E-42 |
| 9381 | OTOF | 56,87 | 7,55 | -2,91 | 0,0018225 |
| 94027 | CGB7 | 52,43 | 4,52 | -3,53 | 4,20E-04 |
| 9472 | AKAP6 | 593,08 | 94,3 | -2,65 | 9,16E-20 |
| 9510 | ADAMTS1 | 1334,35 | 146,08 | -3,19 | 8,96E-21 |
| 9537 | TP53I11 | 1770,14 | 281,24 | -2,65 | 1,58E-30 |
| 9724 | UTP14C | 86,42 | 0,18 | -8,87 | 6,03E-07 |
| 9890 | PLPPR4 | 535,34 | 95,74 | -2,48 | 2,97E-07 |
| 9914 | ATP2C2 | 62,72 | 8,51 | -2,88 | 6,58E-04 |

**Additional Table 4**
