# Supplementary material for: The GD3 ganglioside promotes cell growth, plasticity and chemotherapy resistance of human glioblastoma cancer stem cells
Source: Research Square preprint supplement (doi:10.21203/rs.3.rs-5246487/v1), 2025-03-31
Supplement: Supplementary file 6 [file d34255594b4797f02d00b2e5.docx]

| **Characteristics** | **N = 481** | ***%*** |
| --- | --- | --- |
| **Age** (median, range) | 60.7 (10.9-89.3) | |
| **Gender** (Female/Male) | 184/287 | *39/61* |
| **Molecular subtypes** | |  |
| Proneural | 133 | *27.1* |
| Classical | 187 | *38.1* |
| Mesenchymal | 161 | *32.8* |
| **Molecular characteristics** | |  |
| *IDH* mutation | 0 | *0* |
| MGMT methylated | 140 / 305 | *45.9* |

**Additional Table 1**
